# Supplementary material for: Crotalus durissus ruruimaSnake Venom and a Phospholipase A2Isolated from This Venom Elicit Macrophages to Form Lipid Droplets and Synthesize Inflammatory Lipid Mediators
Source: Hindawi journal article supplement (doi:10.1155/2019/2745286), 2019-11-04
Supplement: f1 [file 2745286.f1.pdf]

## Supplementar Figure 1:

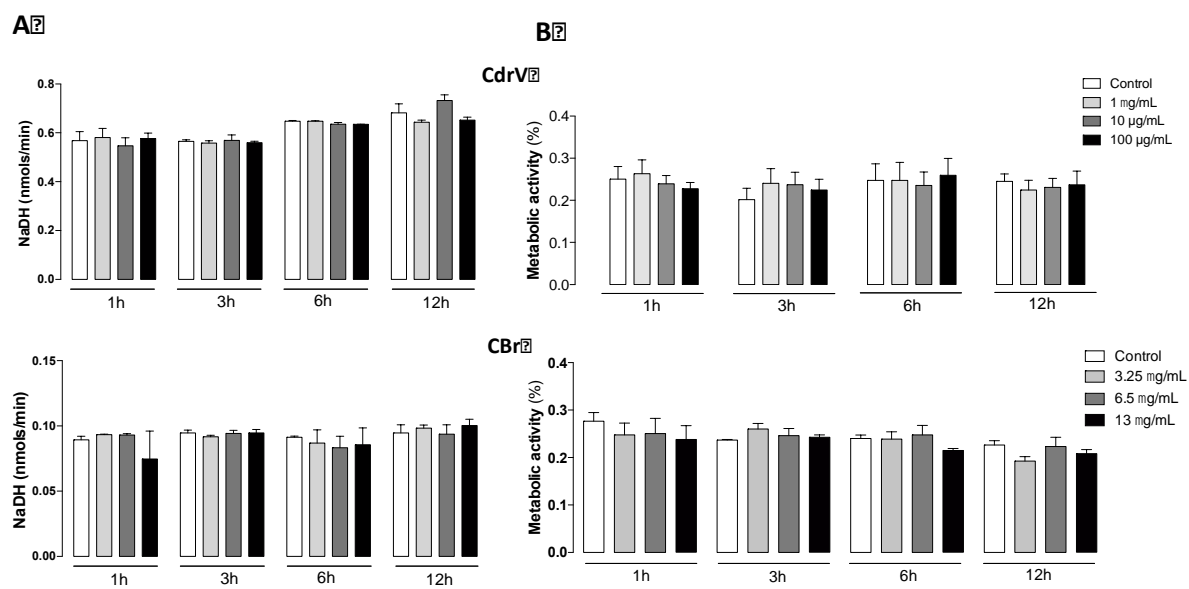

**Supplementar Figure 1: Effect of CdrV and CBr on cell viability.** Cells were incubated with CdrV or CBr (3.25, 6.5 and 13.0 µg/mL) or RPMI (control) from 1 to 12h, and cytotoxicity was assessed by (A) LDH (B) MTT assay. Values represent the mean  $\pm$  SEM from four animals (ANOVA).
